# Supplementary material
Source: PubMed Central journal article supplement (PMC2714386)
Supplement: jn.108.102772_1.pdf [file jn.108.102772_1.pdf]

**Online Supporting Material  
Supplemental Figure 1.**

(A)

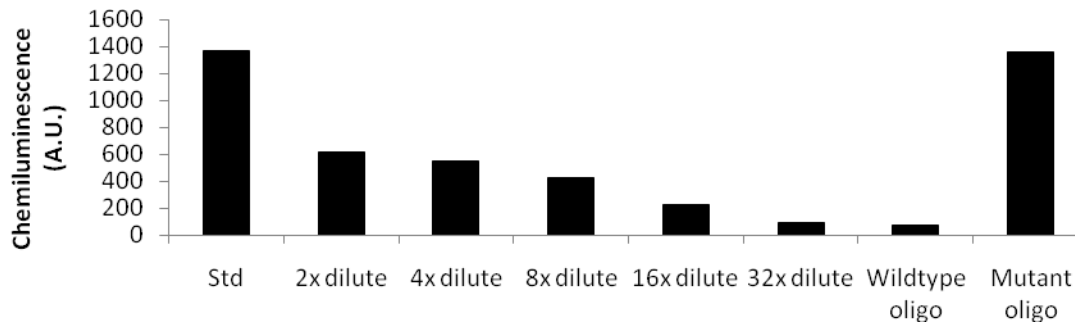

(B)

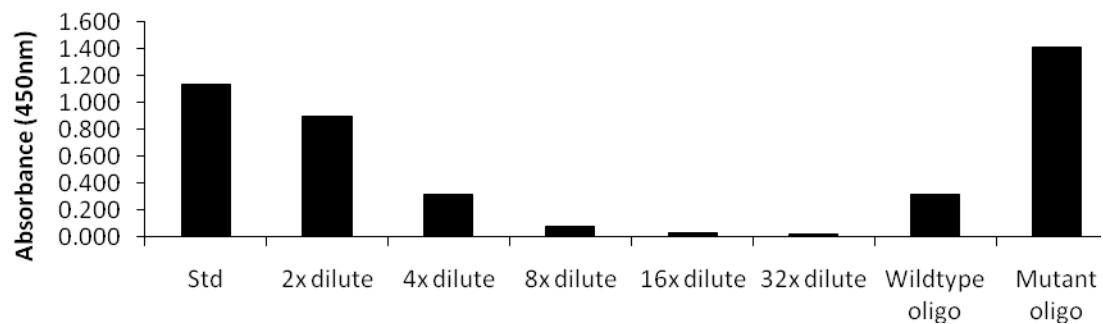

(C)

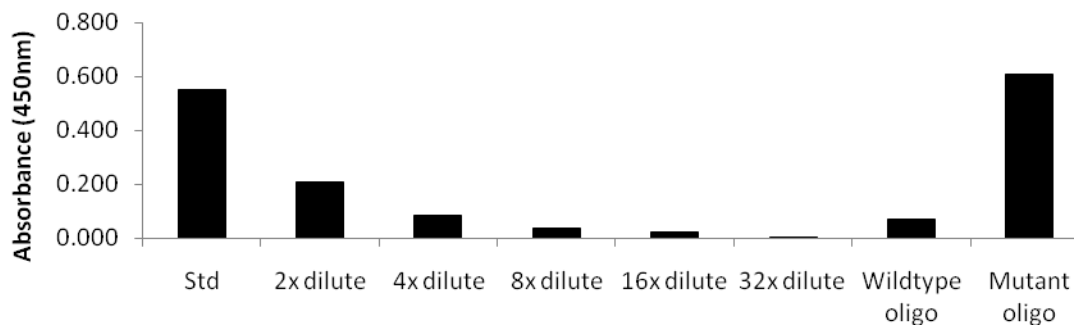

Controls for nuclear factor activation measurements. (A) NF- $\kappa$ B, (B) NFAT and (C) AP-1. Standard nuclear extracts were serially diluted to elicit dose-dependent chemiluminescent or colorimetric readouts. Wild-type or mutant oligonucleotides were added to confirm the specificity of each assay.

**Online Supporting Material  
Supplemental Figure 2.**

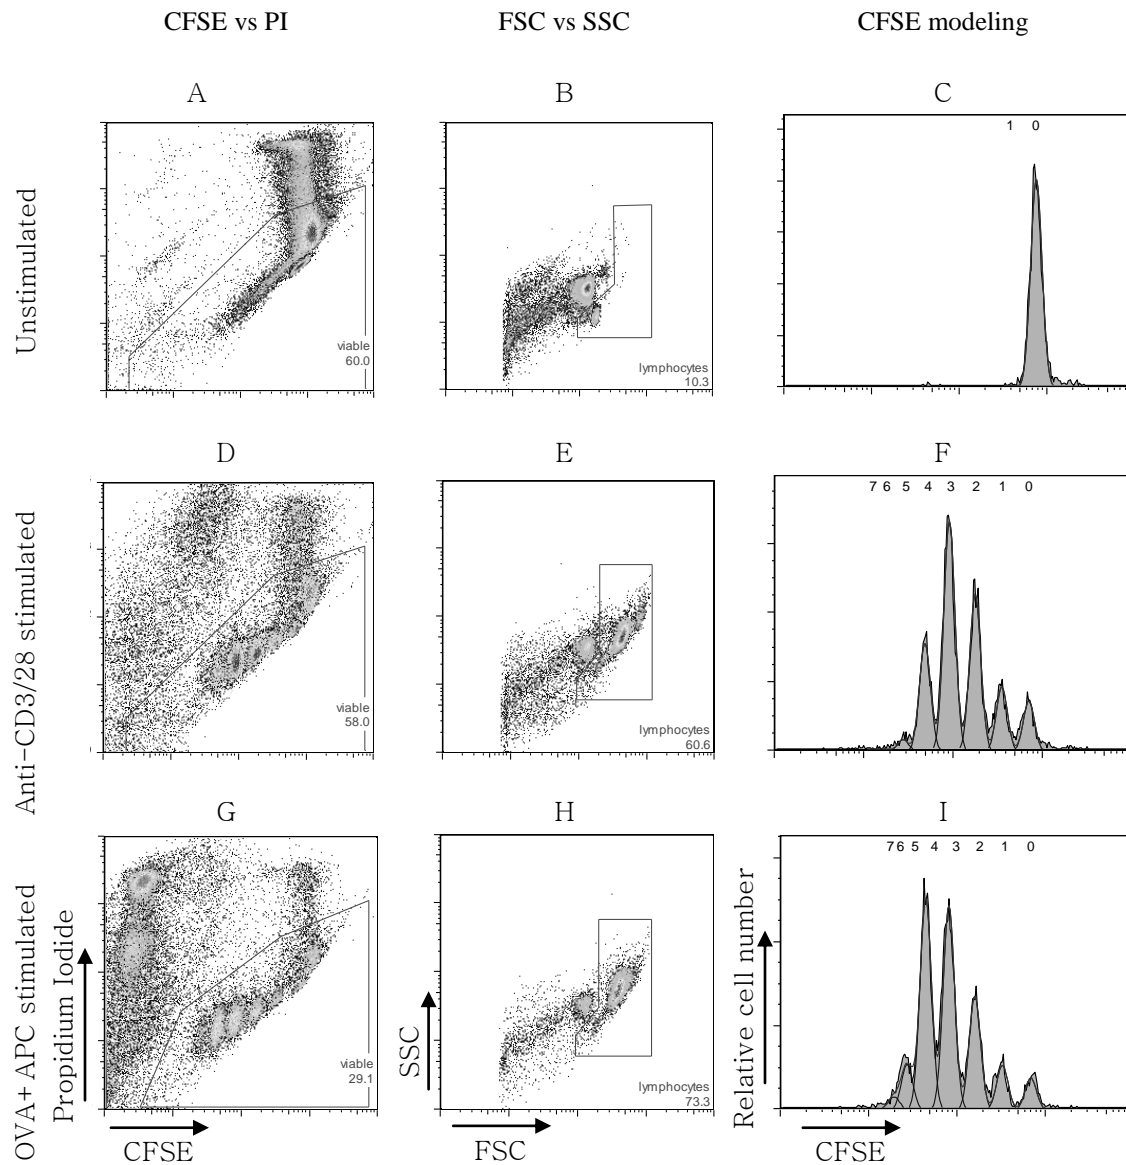

Representative flow cytometry plots and CFSE modeling from a CO-fed control mouse. Unstimulated (A-C), anti-CD3/28 stimulated (D-F) or OVA+APC stimulated (G-I) CD4<sup>+</sup> T-cell cultures were analyzed. Propidium iodide negative cells were gated (A, D, G) which excluded non-viable parental CD4<sup>+</sup> T-cells (A) and auto-fluorescent APC (G), followed by lymphocyte gating by FSC vs SSC plot (B, E, H). Computer-aided modeling of CFSE plot indicated that the peak of unstimulated cells (C) shifts to left (F and I) as cells divide.
